# Supplementary material
Source: MDPI journal article supplement (https://www.mdpi.com/1424-8247/15/9/1038)
Supplement: s1 [file s1]

**Table S1.** Sequences of primers used for qRT-PCR.

| Gene      |                | Sequences(5' to 3')    |
|-----------|----------------|------------------------|
| Claudin-1 | Forward primer | GCTGGGTTTCATCCTGGCTTCT |
|           | Reverse primer | CCTGAGCGGTCACGATGTTGTC |
| ZO1       | Forward primer | GCCGCTAAGAGCACAGCAA    |
|           | Reverse primer | GCCCTCCTTTTAACACATCAGA |
| Occludin  | Forward primer | CTTTGGCTACGGAGGTGGCTAT |
|           | Reverse primer | CTTTGGCTGCTCTTGGGTCTG  |
| CYP1B1    | Forward primer | CCACCAGCCTTAGTGCAGAC   |
|           | Reverse primer | GGCCAGGACGGAGAAGAGT    |
| PTPN11    | Forward primer | AGAGGGAAGAGCAAATGTGTCA |
|           | Reverse primer | CTGTGTTTCCTTGTCCTGACCT |
| CA7       | Forward primer | CGCCCTCTACATGGTTCG     |
|           | Reverse primer | GGTCAGGGAGCCAGGATA     |

1) The 10  $\mu$ L reaction mixtures contain 5  $\mu$ L ChamQ SYBR qPCR Master Mix (Vazyme, China), 0.2  $\mu$ L each primer (Tsingke (Wuhan) Co., Ltd, China), 4.1  $\mu$ L ddH<sub>2</sub>O, and 0.5  $\mu$ L cDNA template.

2) The thermocycling steps of qPCR: (1) 95  $^{\circ}$ C, 3 min; (2) 95  $^{\circ}$ C, 5 s; (3) annealing temperature, 30 s; (4) 72  $^{\circ}$ C, 30 s; (5) plate read; (6) repeat steps (2) to (5) 40 more times; (7) melt-curve analysis, 58  $^{\circ}$ C – 95  $^{\circ}$ C, 0.5  $^{\circ}$ C read.
